# Supplementary material for: Through-bond energy transfer cassette based on spirobifluorene–tetrrhodamine for the colorimetric and ratiometric investigation towards trace Hg2+
Source: Royal Society of Chemistry journal article supplement (doi:10.1039/c3ay40919h), 2013-01-01
Supplement: c3ay40919h.pdf [file c3ay40919h.pdf]

**Through-bond energy transfer cassette based on  
spirobifluorene-tetrrhodamine for the colorimetric and  
ratiometric investigation towards trace Hg<sup>2+</sup>**

**Bo Yang and Wenhui Wu\***

(School of Materials Science & Engineering, Beijing Institute of Technology, Beijing 100081,  
China)

|           |                                                                            |     |
|-----------|----------------------------------------------------------------------------|-----|
| Scheme S1 | The Synthesis route of compound 3                                          | S3  |
| Fig.S1    | FT-IR spectrum of compound 1.                                              | S4  |
| Fig. S2   | <sup>1</sup> H NMR spectrum of compound 1.                                 | S5  |
| Fig. S3   | FT-IR spectrum of compound 2.                                              | S6  |
| Fig. S4   | <sup>1</sup> H NMR spectrum of compound 2.                                 | S7  |
| Fig. S5   | FT-IR spectrum of compound 3.                                              | S8  |
| Fig. S6   | <sup>1</sup> H NMR spectrum of compound 3.                                 | S9  |
| Fig. S7   | Absorption of rhodamine moiety in 2 and emission spectrum of 1.            | S10 |
| Fig. S8   | Fluorescence emission spectra of 2 and 3.                                  | S11 |
| Fig. S9   | Fluorescence emission spectra of 2 and 3 (40 μM).                          | S12 |
| Fig. S10  | Fluorescence spectra of 2 (10 μM) in the presence of different metal ions. | S13 |

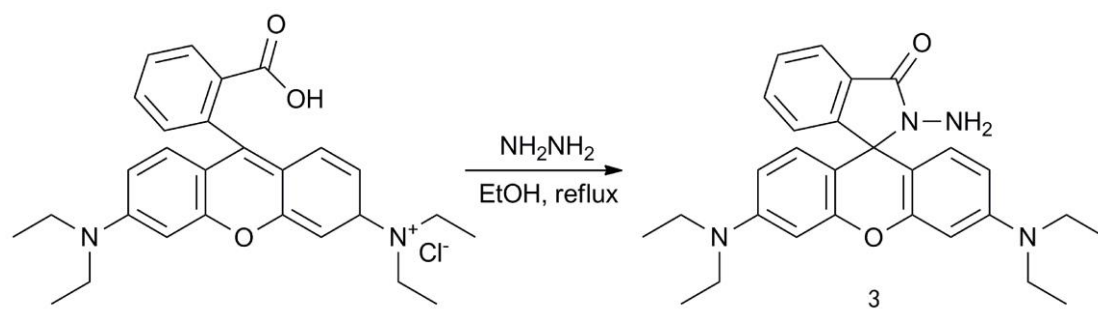

Scheme S1 The Synthesis route of compound 3

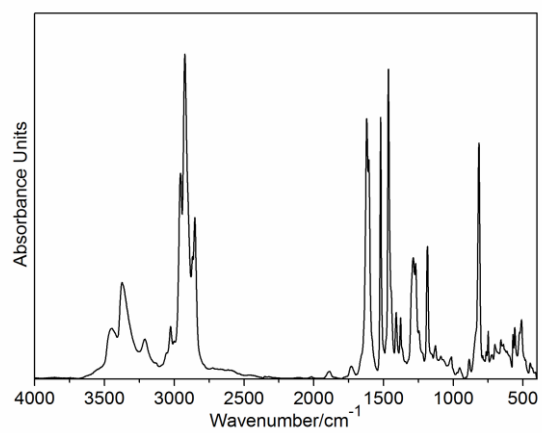

**Fig.S1 FT-IR spectrum of compound 1.**

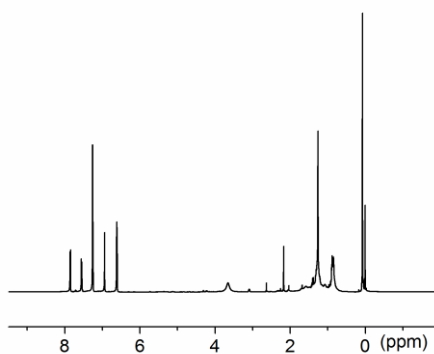

**Fig. S2** <sup>1</sup>H NMR spectrum of compound 1.

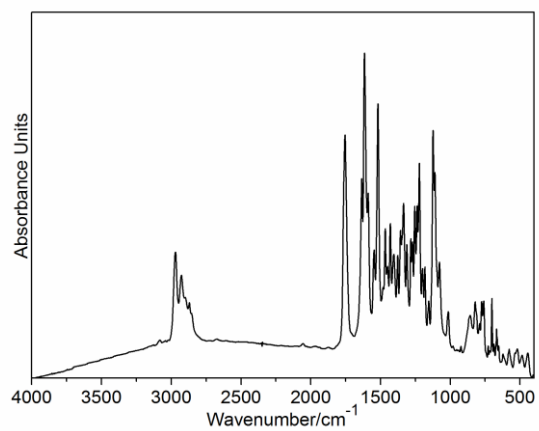

**Fig. S3** FT-IR spectrum of compound 2.

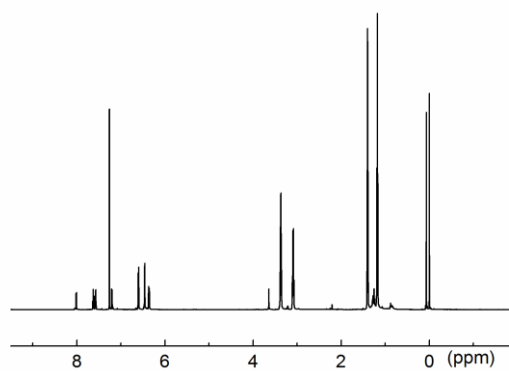

**Fig. S4** <sup>1</sup>H NMR spectrum of compound 2.

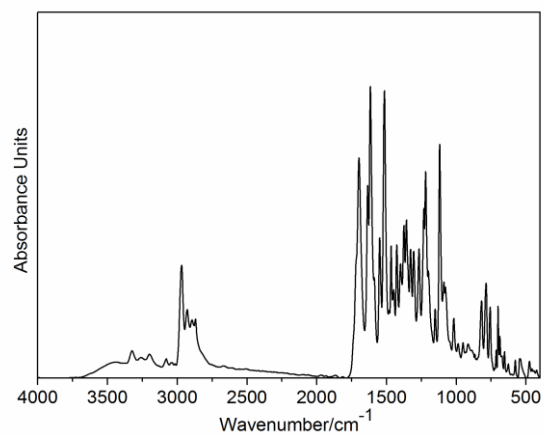

**Fig. S5** FT-IR spectrum of compound 3.



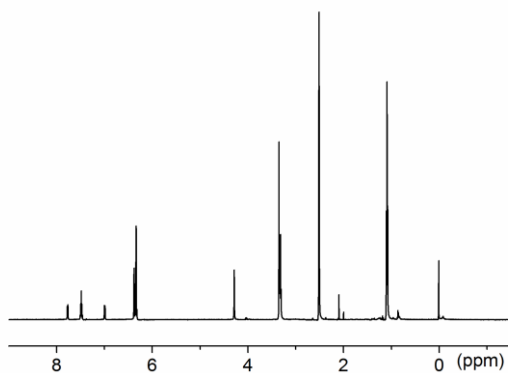

**Fig. S6** <sup>1</sup>H NMR spectrum of compound 3.

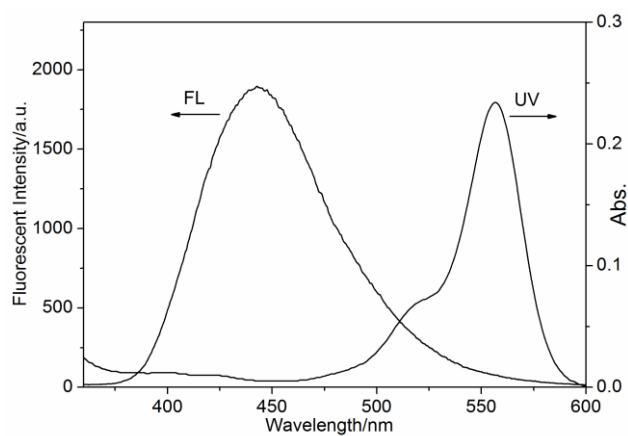

**Fig. S7** Absorption of rhodamine moiety in compound 2 (right) and emission spectrum of compound 1 (left). Shaded area indicates the spectral overlap between the emission of compound 1 and the rhodamine moiety characteristic absorption.

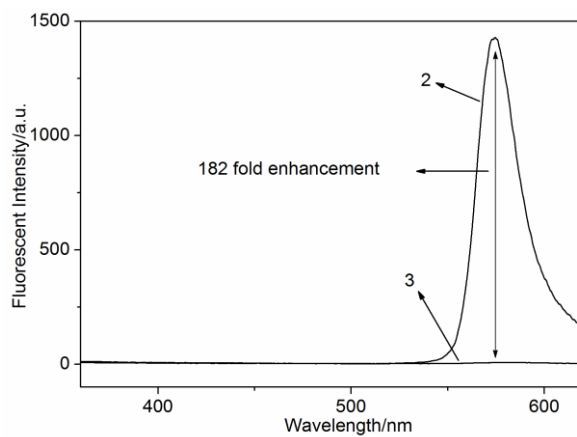

**Fig. S8** Fluorescence emission spectra of compound 2 (10  $\mu\text{M}$ ) in the presence of  $\text{Hg}^{2+}$  (100  $\mu\text{M}$ ) and compound 3 (40  $\mu\text{M}$ ) in the presence of  $\text{Hg}^{2+}$  (100  $\mu\text{M}$ ) in methanol/ $\text{H}_2\text{O}$  (4:1, v/v).  $\lambda_{\text{ex}}=314$  nm. Equation used  $(I-I_0/I_0)$ ,  $I_0$ =fluorescence intensity of compound 3 at 570 nm after the addition of  $\text{Hg}^{2+}$ ;  $I$ =fluorescence intensity at 570 nm of compound 2 after the addition of  $\text{Hg}^{2+}$ .

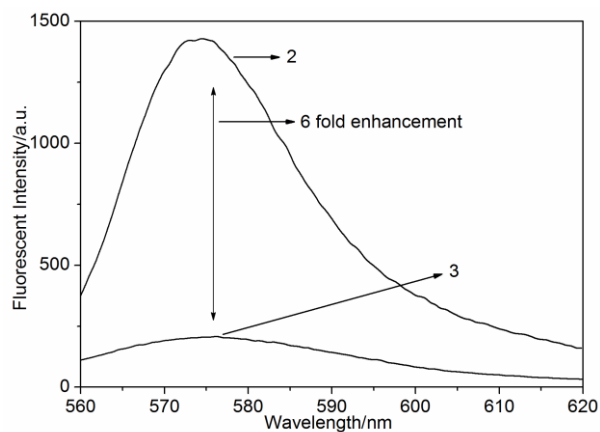

**Fig. S9** Fluorescence emission spectra of compound 2 (10  $\mu\text{M}$ ) in the presence of  $\text{Hg}^{2+}$  (100  $\mu\text{M}$ ) with an excitation at 314 nm in methanol/ $\text{H}_2\text{O}$  (4:1, v/v) and compound 3 (40  $\mu\text{M}$ ) in the presence of  $\text{Hg}^{2+}$  (100  $\mu\text{M}$ ) with an excitation at 550 nm in methanol/ $\text{H}_2\text{O}$  (4:1, v/v). Equation used  $(I-I_0/I_0)$ ,  $I_0$ =fluorescence intensity of compound 3 at 570 nm after the addition of  $\text{Hg}^{2+}$ ;  $I$ =fluorescence intensity at 570 nm of compound 2 after the addition of  $\text{Hg}^{2+}$ .

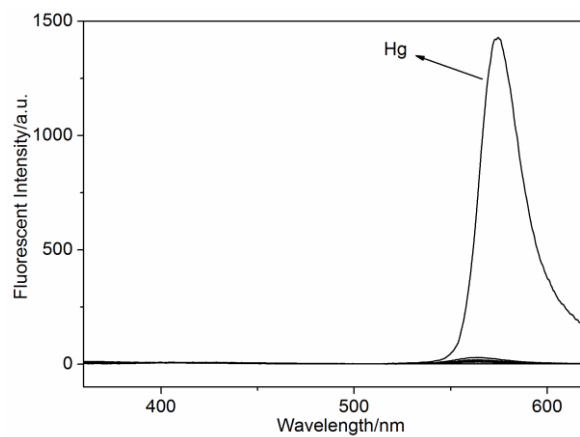

**Fig. S10** Fluorescence emission spectra recorded of compound 2 (10  $\mu\text{M}$ ) in the presence of different metal ions (100  $\mu\text{M}$ ) in methanol/ $\text{H}_2\text{O}$  (4:1, v/v).  $\lambda_{\text{ex}}$ =314 nm.
